# Supplementary material for: IgG subclass responses to excreted-secreted antigens of Plasmodium falciparum in a low-transmission malaria area of the Peruvian Amazon
Source: Springer Nature journal article supplement (doi:10.1186/s12936-018-2471-6), 2018-09-11
Supplement: MOESM1 [file 16114184]

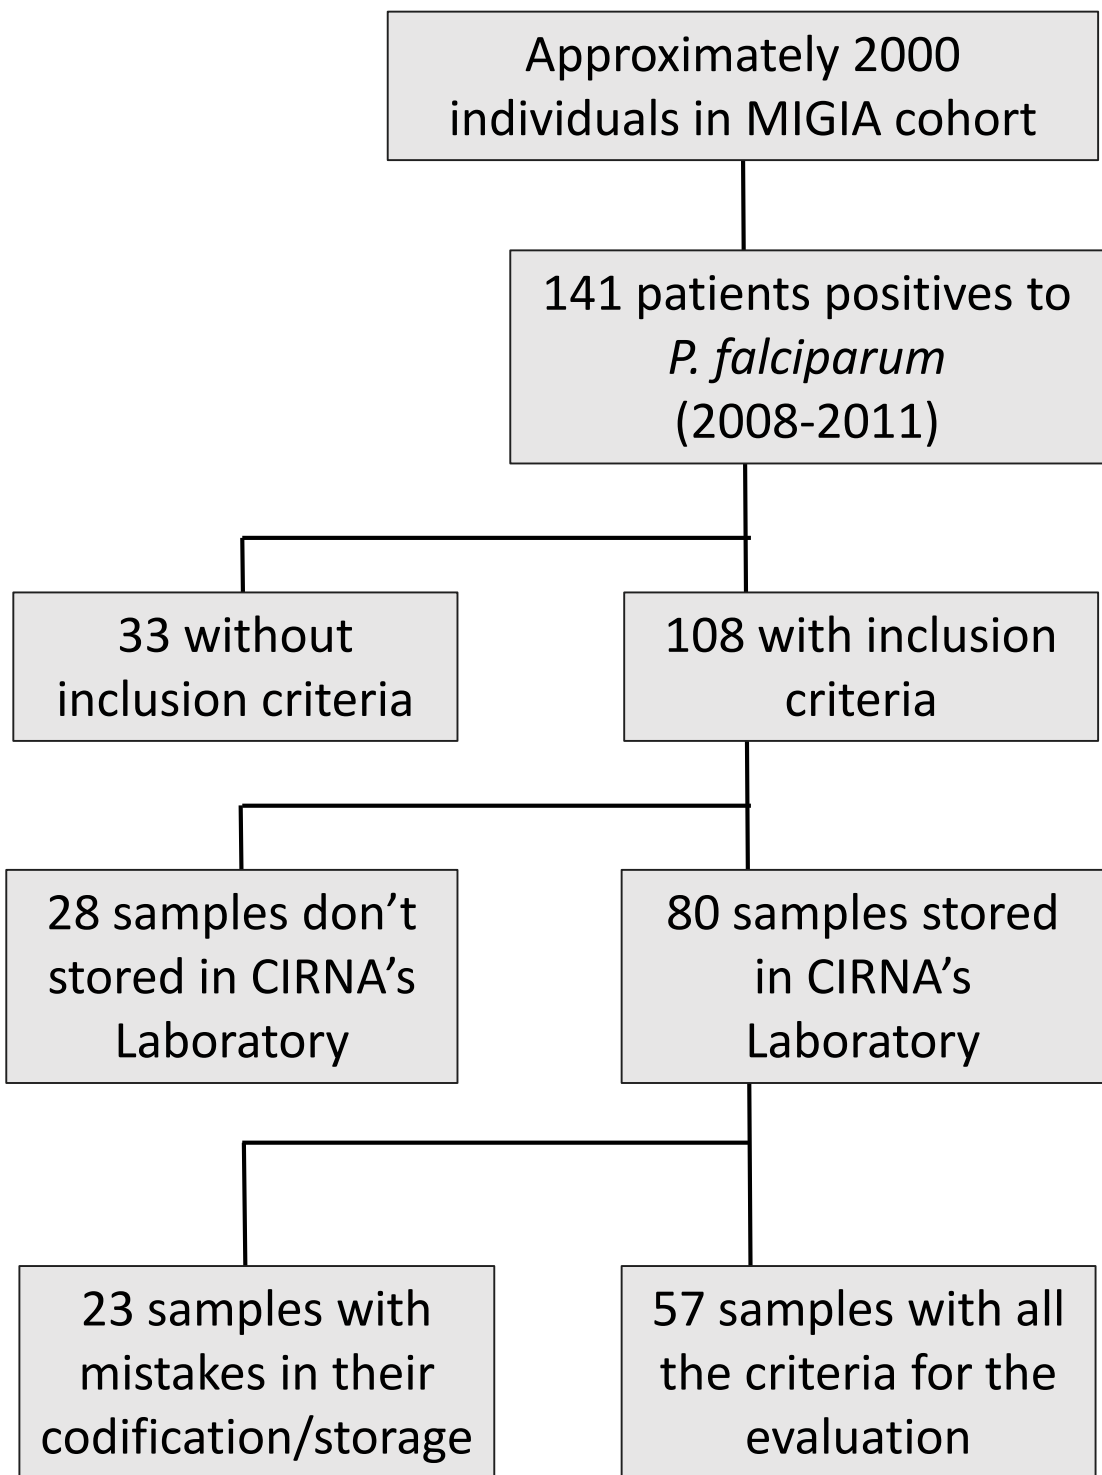

Flowchart of sample selection.
